# Supplementary material for: Predicting mortality among patients with liver cirrhosis in electronic health records with machine learning
Source: PubMed Central journal article supplement (PMC8407576; doi:10.1371/journal.pone.0256428), 2021-08-31

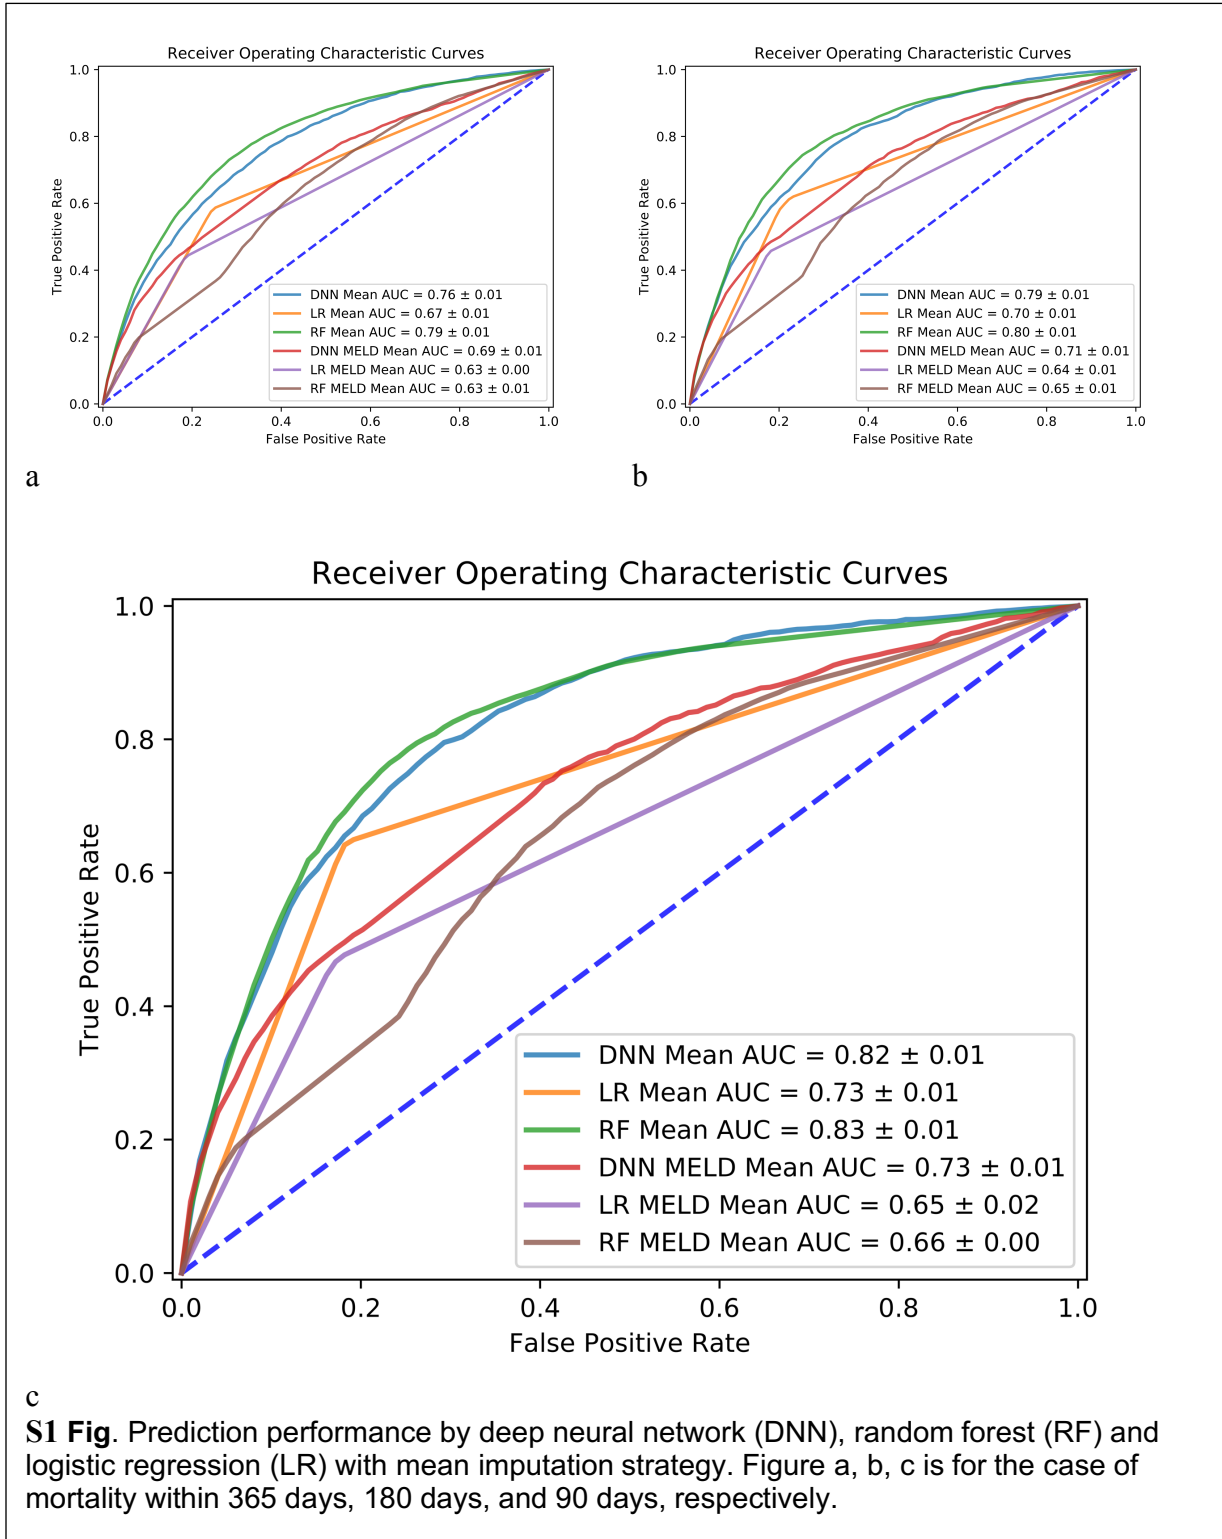

Supplement: pone.0256428.s001.pdf [file pone.0256428.s001.pdf]
